# Supplementary material for: Diversification of DNA-Binding Specificity by Permissive and Specificity-Switching Mutations in the ParB/Noc Protein Family
Source: PubMed Central journal article supplement (PMC7383237; doi:10.1016/j.celrep.2020.107928), 2020-07-21
Supplement: mmc1.pdf [file mmc1.pdf]

**Cell Reports, Volume 32**

**Supplemental Information**

**Diversification of DNA-Binding Specificity  
by Permissive and Specificity-Switching Mutations  
in the ParB/Noc Protein Family**

**Adam S.B. Jalal, Ngat T. Tran, Clare E. Stevenson, Elliot W. Chan, Rebecca Lo, Xiao Tan, Agnes Noy, David M. Lawson, and Tung B.K. Le**

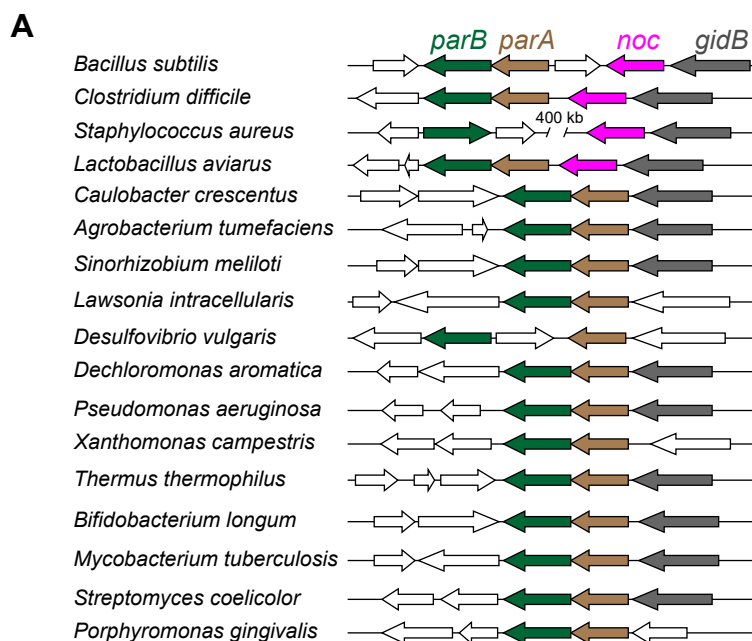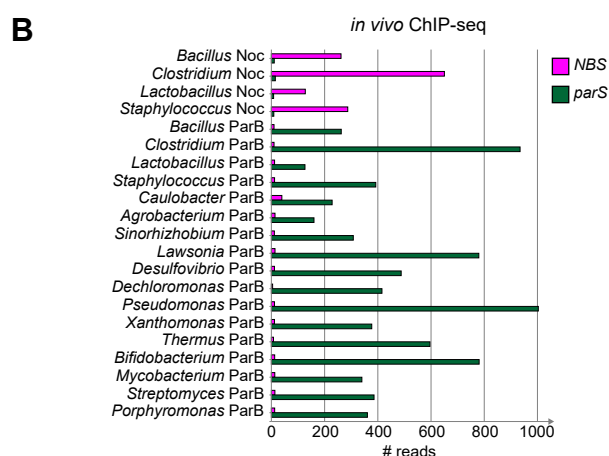

**Figure S1. DNA-binding specificity for *parS* and *NBS* is conserved among *ParB* and *Noc* orthologs. Related to Figure 1. (A) Genomic context of *ParB*- and *Noc*-encoding genes in various bacterial species. *parB*, *parA*, *noc*, and the highly conserved *gidB* gene, are colored in dark green, brown, magenta, and grey, respectively. Genes at the border of the *parB-parA-noc* cluster (open arrows) vary between bacterial species. (B) The *in vivo* binding preferences of *ParB/Noc* to *parS/NBS* as measured by ChIP-seq. An *E. coli* strain with a single *parS* and *NBS* site engineered onto the chromosome was used as a heterologous host for expression of FLAG-tagged *ParB/Noc*. For ChIP-seq data, reads in a 100-bp window surrounding the *parS/NBS* site were quantified and used as a proxy for the enrichment of immunoprecipitated *parS* or *NBS* DNA.**

**A** Noc (DBD)-NBS co-crystal structure

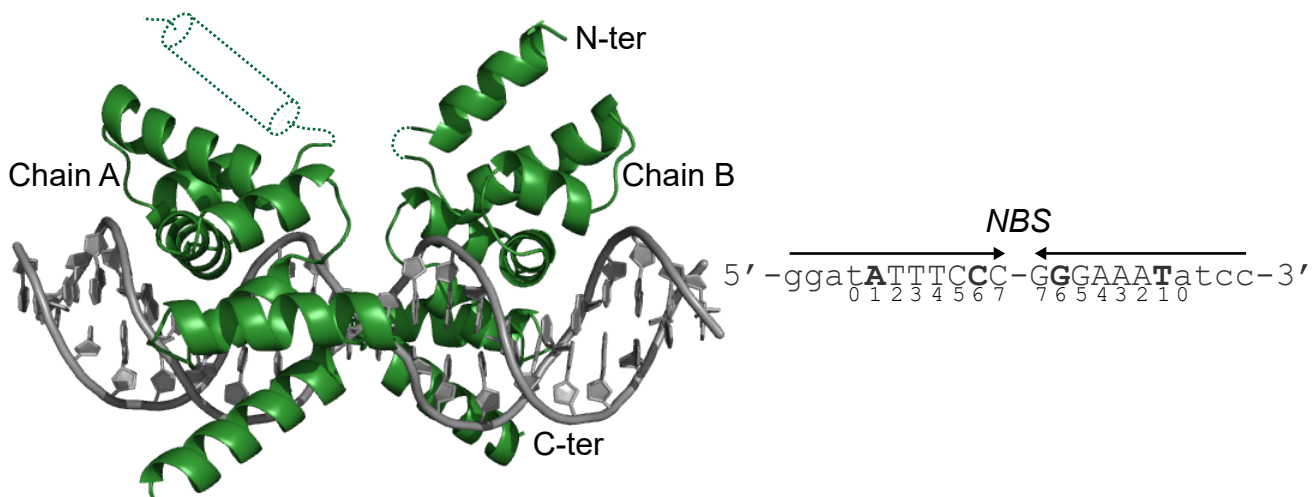

**B**

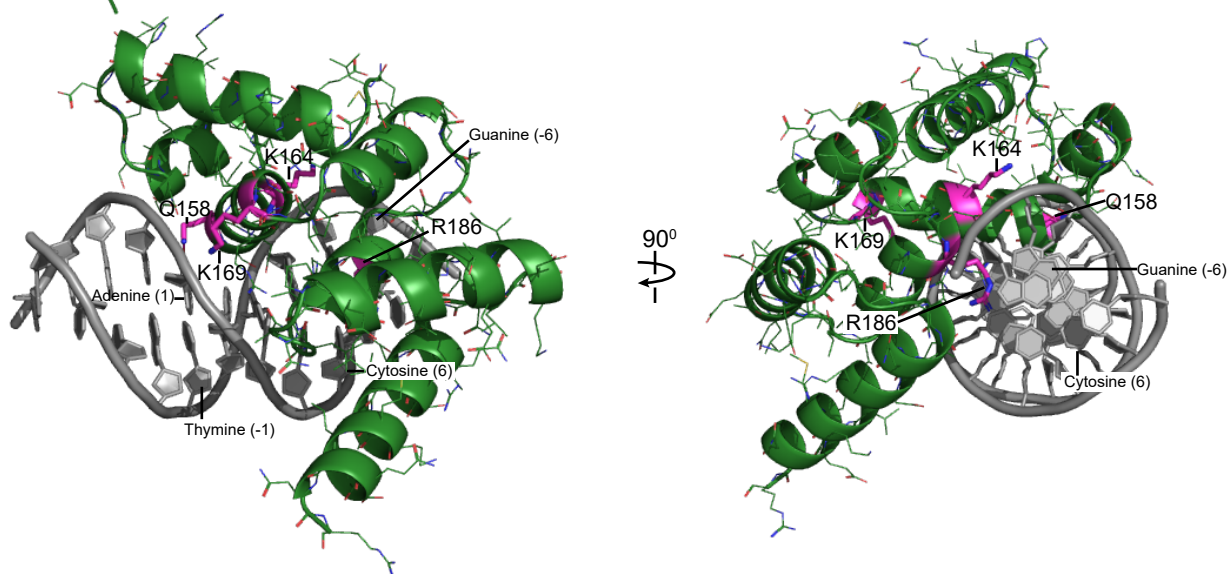

**C**

|        |                                                                   |     |
|--------|-------------------------------------------------------------------|-----|
| CcParB | DLNVLEEALSYKVLMEKFERTQENIAQTIGKSRSHVA                             | 177 |
| BsNoc  | ELSSIEEAHAYARLLELHDLTQEALAQRLGKGQSTIA                             | 162 |
| CcParB | N <sup>T</sup> MRLLLALPDEVQSYLVSGELTAGHARAIAAADPV-                | 213 |
| BsNoc  | N <sup>K</sup> LRLLLKLPQPVQEAIMEKKITER <sup>R</sup> HARALIPLKQPEL | 199 |
| CcParB | --ALAKQIIIEGGLSVRETEALARKAPNLSAG                                  | 242 |
| BsNoc  | QVTLLETEIIEKSLNVKQTEDRVVKMLEQQQR                                  | 230 |

**D**

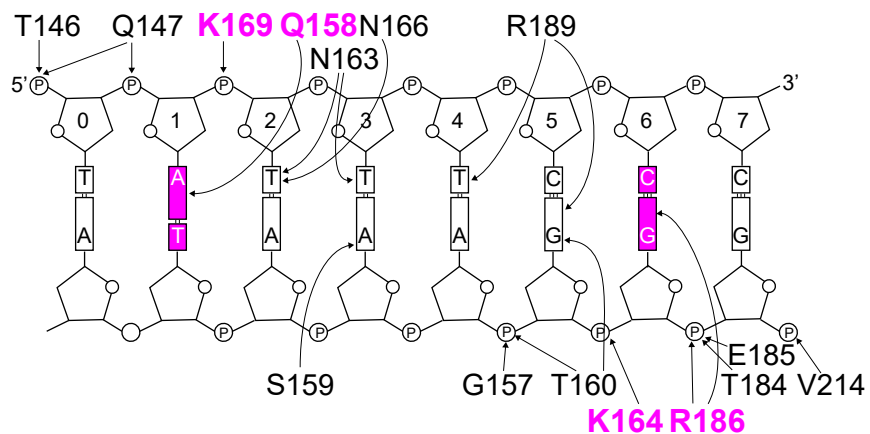

**Figure S2. Co-crystal structures of the Noc (DBD)-NBS complex. Related to Figure 4.** (A) The structure of two Noc (DNA-binding domain) monomers (dark green) in complex with a 22-bp NBS DNA (grey). A helix (residues 113-125, dotted dark green cylinder) in chain A is not resolved. The nucleotide sequence of the 22-bp NBS site is shown on the left-hand side; bases (Adenine 1 and Cytosine 6) that are different from *parS* are in bold. (B) One monomer of Noc (DBD) is shown in complex with an NBS half-site; four core specificity residues are shown in stick presentation, labeled, and colored in magenta. Other residues surrounding specificity residues are shown as lines and colored in dark green. (C) Amino acid sequences of *C. crescentus* ParB and *B. subtilis* Noc with the positions of four specificity residues highlighted in dark green and magenta, respectively. Secondary structures are shown above the sequence alignment. (D) Schematic representation of Noc (DBD)-NBS interactions. For simplicity, only half of NBS is shown. The two bases at position 1 and 6 that are different between *parS* and NBS are highlighted in magenta. The four core specificity residues are also colored in magenta.

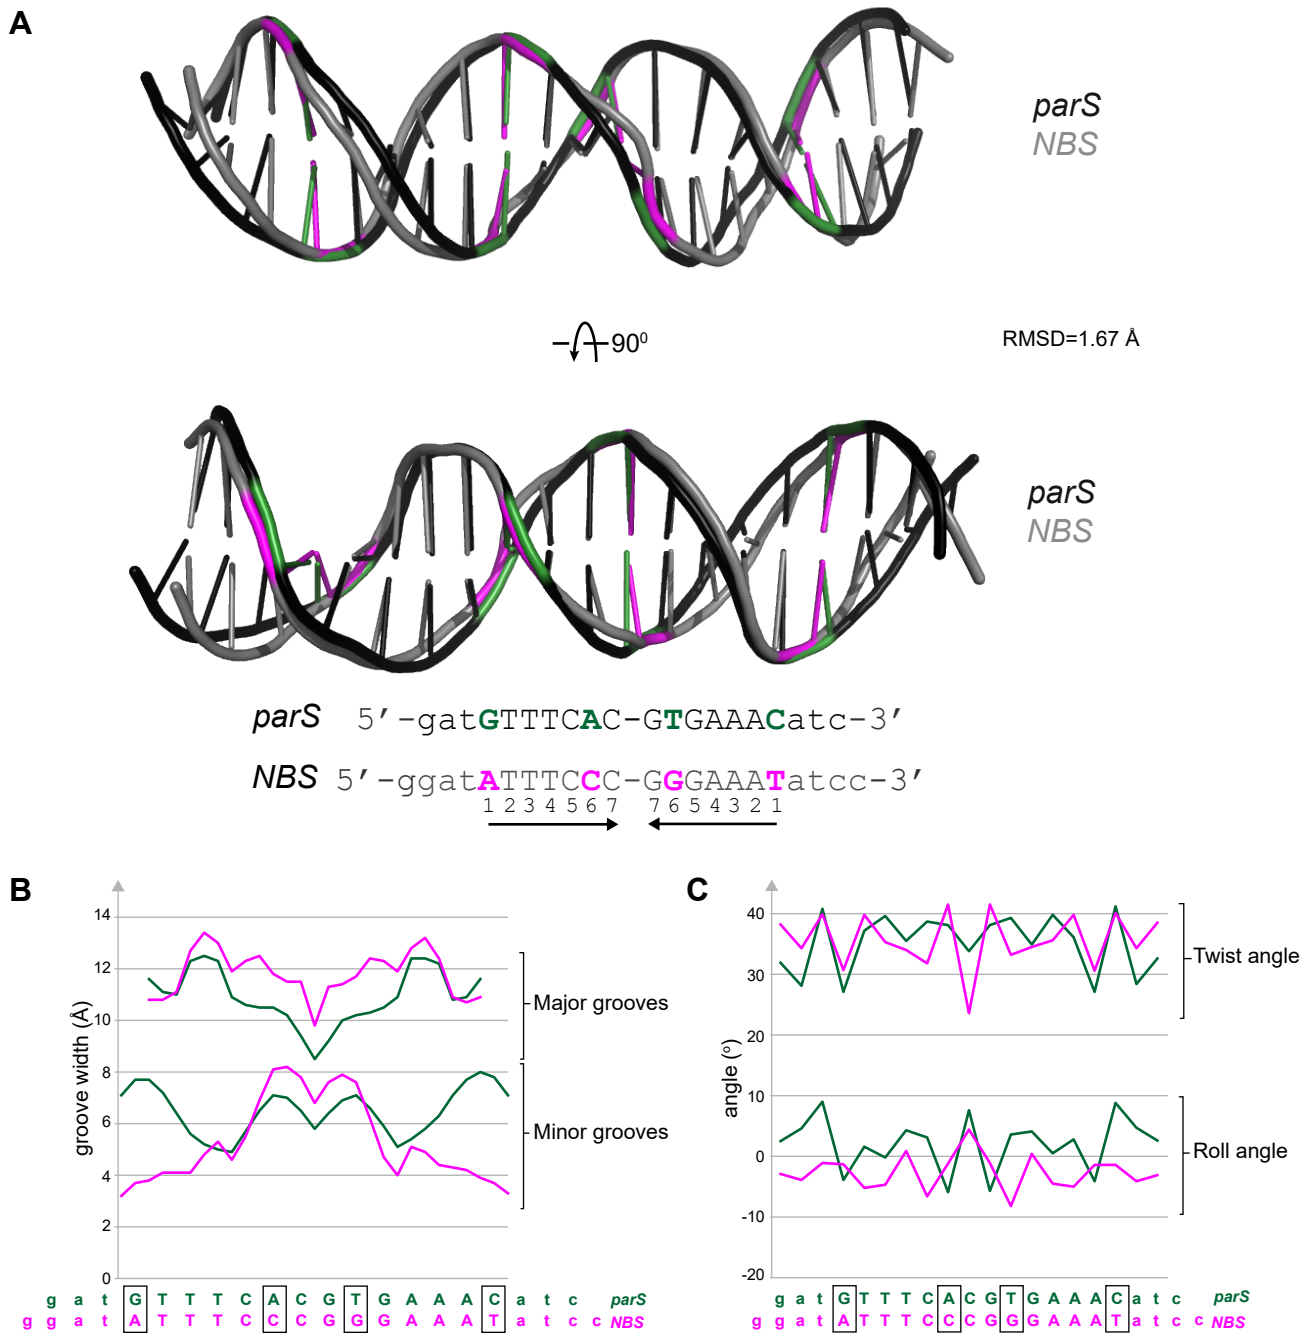

**Figure S3. Conformational changes at *parS* and *NBS* DNA within the two co-crystal structures. Related to Figure 4. (A)** Superimposition of *parS* and *NBS* DNA structures, root-mean-square deviation (RMSD) value is also shown. Bases that differ between *parS* (dark green) and *NBS* (magenta) are highlighted. **(B)** The major and minor groove widths of the bound DNA (*parS*: dark green, *NBS*: magenta). **(C)** The roll and twist angles for each base pair step of the bound DNA (*parS*: dark green, *NBS*: magenta).

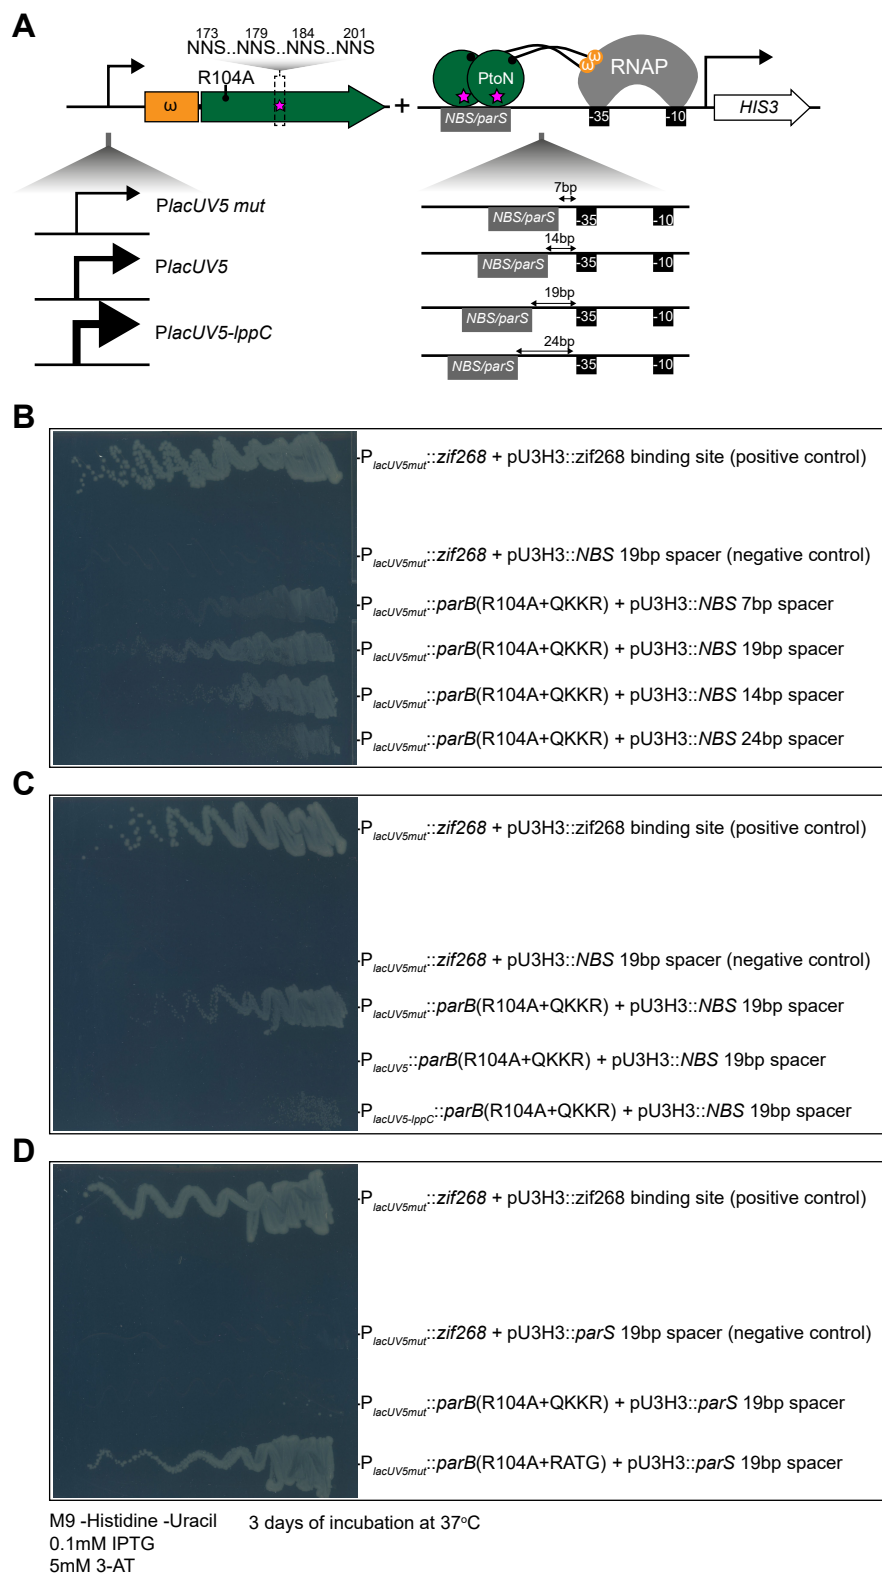

**Figure S4. Optimization of bacterial one-hybrid (B1H) assay to select for variants that bind *parS* or *NBS*. Related to Figure 5. (A)** The strength of the promoter that drives the expression of *parB* variants and the distances between the *parS* or *NBS* binding site to the core -10 -35 promoter were optimized. **(B)** A 19-bp gap between *NBS/parS* and the core promoter is optimal, based on the streak test for cell growth in a minimal medium lacking histidine. **(C)** A weak promoter ( $P_{lacUV5mut}$ ) is optimal, based on the streak test for cell growth in a minimal medium lacking histidine. **(B and D)** The presence of *parS* or *NBS* upstream of *HIS3*, in the absence of ParB variants, did not auto-activate its expression.

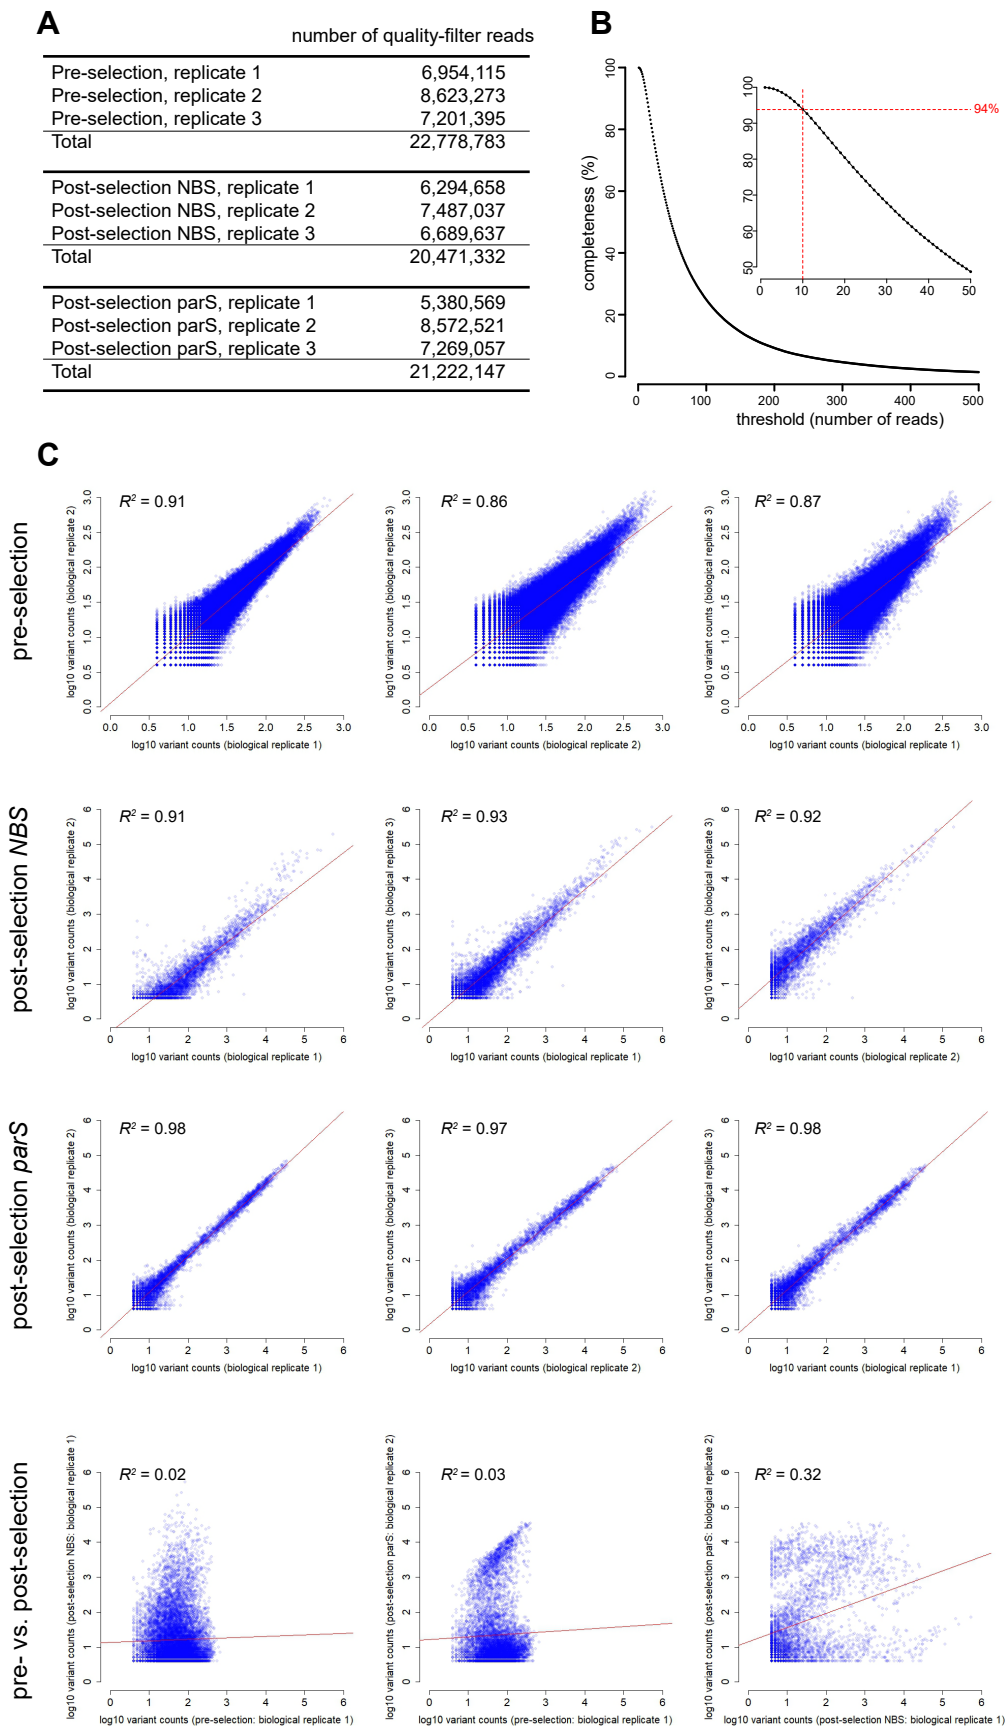

**Figure S5. Statistics of deep sequencing reads and completeness of starting libraries. Related to Figure 5. (A)** Number of quality-filtered reads for each biological replicate, for pre- and post-selection libraries. **(B)** The completeness of pre-selection libraries at different thresholds. A completeness of 100% means that all 160,000 variants lacking stop codons were present in the pre-selection library. In the starting library, greater than 94% of the predicted variants were represented by at least 10 reads. **(C)** Reproducibility of biological replicates: pre- vs. pre-selection replicates and pre- vs. post-selection replicates. Pearson's correlation coefficients ( $R^2$ ) are also shown. Red lines show least squares best fits.

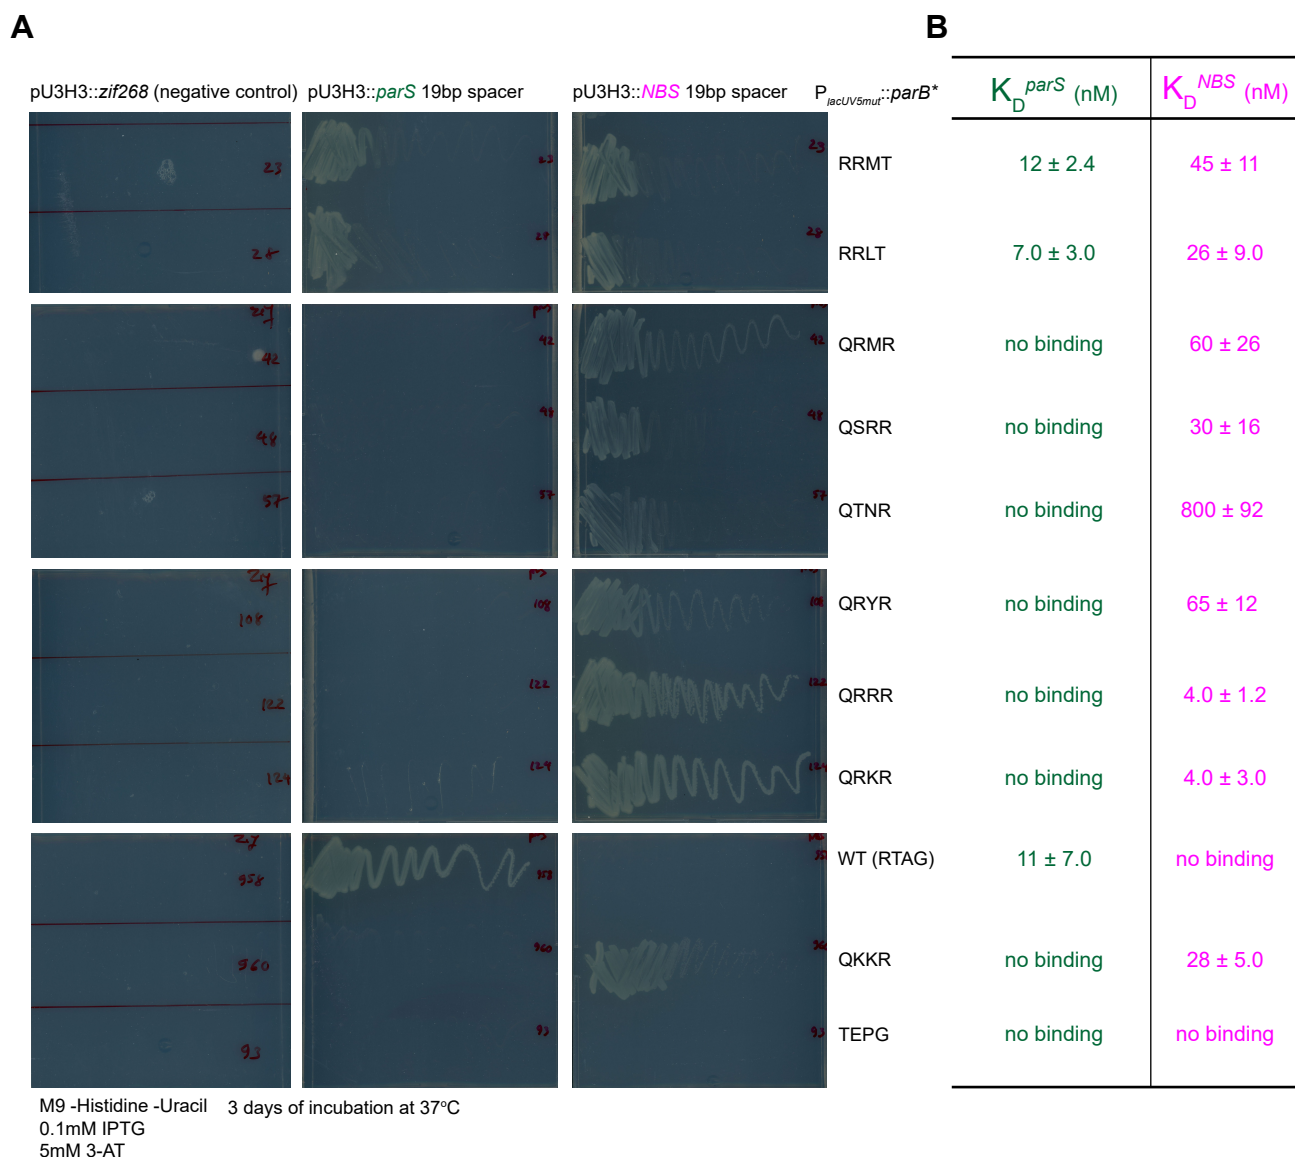

**Figure S6. Validation of selected variants from the deep mutational scanning experiments. Related to Figure 5. (A)** Validation by pairwise bacterial one-hybrid assays. The ability of nine selected variants to grow on a minimal medium lacking histidine (but supplemented with 5mM 3-AT to increase the stringency) was assessed by a streak test. Plasmid harboring a binding site of an eukaryotic transcription factor (*zif268*) served as a negative control. **(B)** Validation by bio-layer interferometry assays. Selected variants were expressed, purified, and  $K_D \pm SD$  were measured by bio-layer interferometry assay.



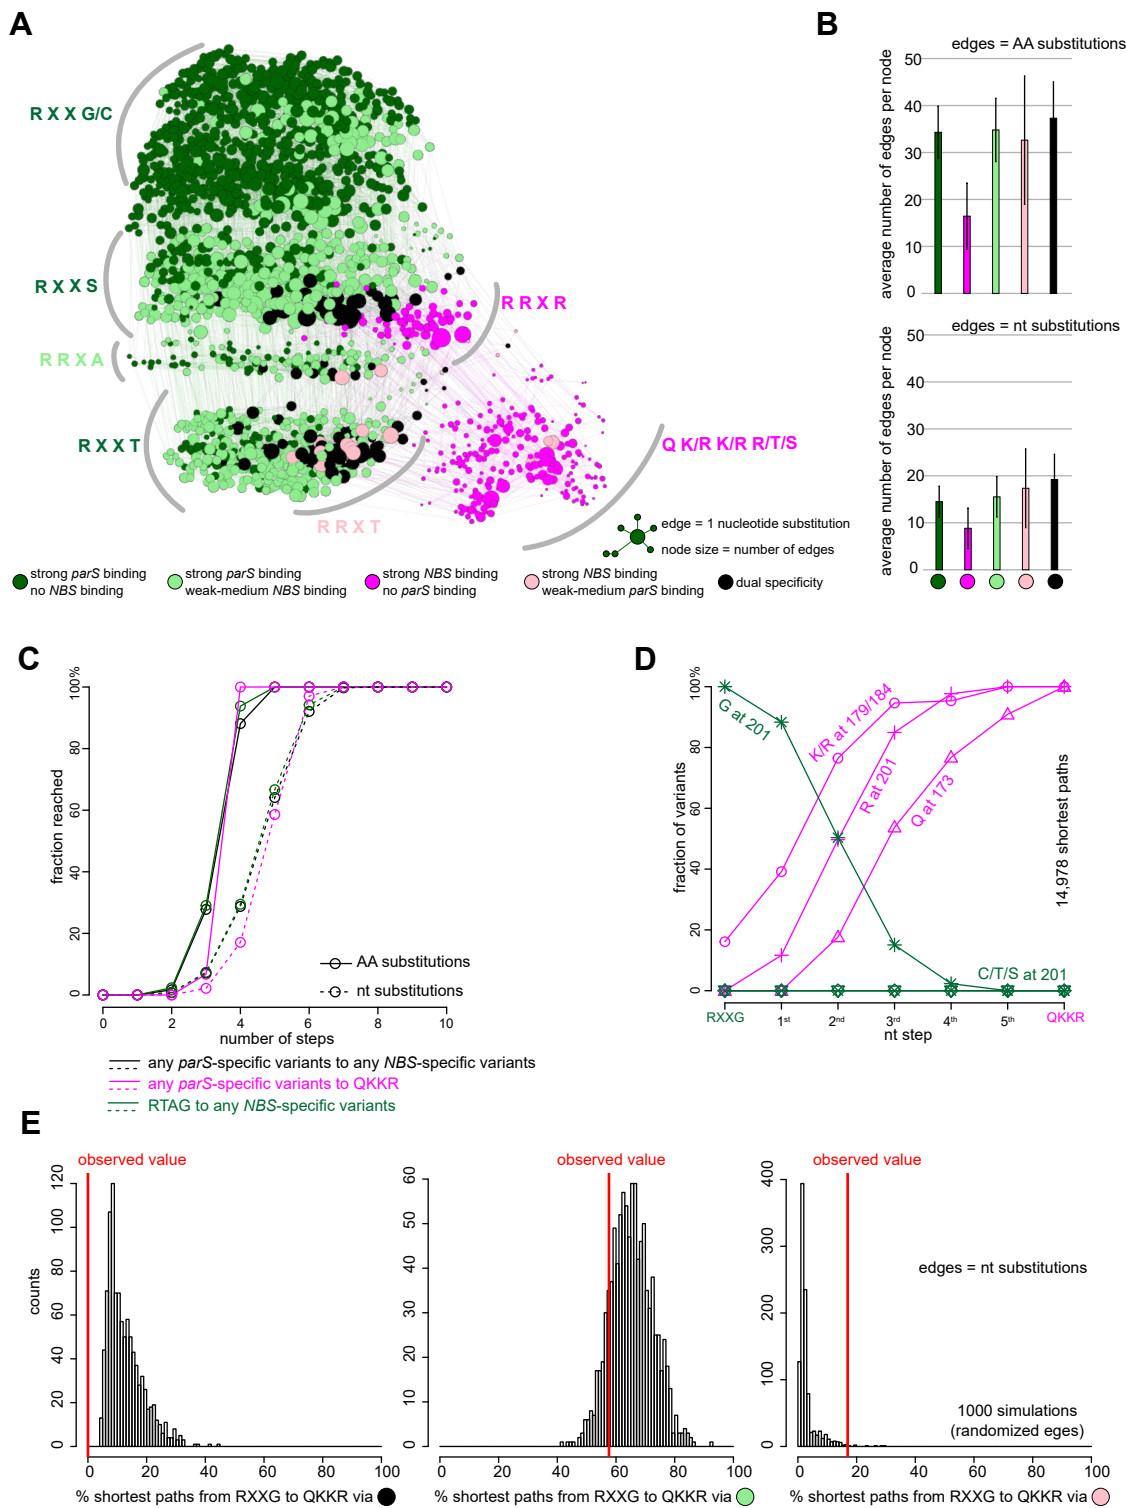

**Figure S7. Deep mutational scanning experiments reveal the common properties of mutational paths. Related to Figure 6. (A)** A force-directed network graph connecting strong *parS*-binding variants to strong NBS-binding variants. Nodes represent individual variants, and edges represent single nucleotide (nt) substitutions. Node sizes are proportional to their corresponding numbers of edges. Node colors correspond to different classes of variants. **(B)** Average number of edges per node. **(C)** Cumulative fraction of variants that reached their destinations in a given number of amino acid (solid line) or nucleotide (dotted line) substitutions. Black lines: from any *parS*-specific variants to any NBS-specific variants. Magenta lines: from any *parS*-specific variants to QK/R. Dark green lines: from RTAG to any NBS-specific variants. **(D)** Fraction of intermediates on all shortest paths from highly *parS*-specific RXXG variants to the NBS-preferred QK/R that have permissive amino acids (K/R) at either position 179/184 or both, or have R at position 201, or Q at position 173, or C/T/S at position 201 after a given number of nt steps. **(E)** Percentage of shortest paths that traversed black, light green, or pink variants to reach QK/R from any of the highly *parS*-specific RXXG variants (red lines). The result was compared to ones from 1,000 simulations where the by-nt-substitution edges were shuffled randomly while keeping the total number of nodes, edges, and graph density constant.

**TABLE S1. STRAINS. Related to STAR Methods.**

| <b>Strains</b> | <b>Strains/descriptions</b>                                                                                                                                     | <b>Source</b>                                       |
|----------------|-----------------------------------------------------------------------------------------------------------------------------------------------------------------|-----------------------------------------------------|
| AB1157         | <i>thr-1, ara-14, leuB6, Δ(gpt-proA)62, lacY1, tsx-33, supE44, galK2, rac-, hisG4(Oc), rfbD1, mgl-51, rpsL31, kdgK51, xyl-5, mtl-1, argE3 (Oc), thi-1, qsr-</i> | Yale <i>E. coli</i> Genetic Stock Center            |
| DH5α           | <i>E. coli</i> host for DNA cloning and propagation of plasmid                                                                                                  | Le lab collection                                   |
| Rosetta (DE3)  | <i>E. coli</i> host for protein overexpression from an IPTG-inducible T7 promoter                                                                               | Merck                                               |
| CJW4025        | BL21 pET21b:: <i>parB-(his)6</i>                                                                                                                                | Gift from Christine Jacob-Wagner (Lim et al., 2014) |
| TLE3000        | <i>AB1157 ybbD::parS::markerless ygcE::NBS::markerless</i>                                                                                                      | This study                                          |
| TLE3001        | <i>USO rpoZ- hisB- pyrF-</i>                                                                                                                                    | Scott Wolfe (Noyes et al., 2008) via Addgene        |
|                |                                                                                                                                                                 |                                                     |
|                | TLE3000+pUT18C::1xFLAG- <i>Bacillus subtilis</i> Noc                                                                                                            | This study                                          |
|                | TLE3000+pUT18C::1xFLAG- <i>Clostridium difficile</i> Noc                                                                                                        | This study                                          |
|                | TLE3000+pUT18C::1xFLAG- <i>Lactobacillus aviarius</i> Noc                                                                                                       | This study                                          |
|                | TLE3000+pUT18C::1xFLAG- <i>Staphylococcus aureus</i> Noc                                                                                                        | This study                                          |
|                | TLE3000+pUT18C::1xFLAG- <i>Bacillus subtilis</i> ParB                                                                                                           | This study                                          |
|                | TLE3000+pUT18C::1xFLAG- <i>Clostridium difficile</i> ParB                                                                                                       | This study                                          |
|                | TLE3000+pUT18C::1xFLAG- <i>Lactobacillus aviarius</i> ParB                                                                                                      | This study                                          |
|                | TLE3000+pUT18C::1xFLAG- <i>Staphylococcus aureus</i> ParB                                                                                                       | This study                                          |
|                | TLE3000+pUT18C::1xFLAG- <i>Caulobacter crescentus</i> ParB                                                                                                      | This study                                          |
|                | TLE3000+pUT18C::1xFLAG- <i>Agrobacterium tumefaciens</i> ParB                                                                                                   | This study                                          |
|                | TLE3000+pUT18C::1xFLAG- <i>Sinorhizobium meliloti</i> ParB                                                                                                      | This study                                          |
|                | TLE3000+pUT18C::1xFLAG- <i>Lawsonia intracellularis</i> ParB                                                                                                    | This study                                          |
|                | TLE3000+pUT18C::1xFLAG- <i>Desulfovibrio vulgaris</i> ParB                                                                                                      | This study                                          |
|                | TLE3000+pUT18C::1xFLAG- <i>Dechloromonas aromatica</i> ParB                                                                                                     | This study                                          |
|                | TLE3000+pUT18C::1xFLAG- <i>Pseudomonas aeruginosa</i> ParB                                                                                                      | This study                                          |
|                | TLE3000+pUT18C::1xFLAG- <i>Xanthomonas campestris</i> ParB                                                                                                      | This study                                          |
|                | TLE3000+pUT18C::1xFLAG- <i>Thermus thermophilus</i> ParB                                                                                                        | This study                                          |
|                | TLE3000+pUT18C::1xFLAG- <i>Bifidobacterium longum</i> ParB                                                                                                      | This study                                          |
|                | TLE3000+pUT18C::1xFLAG- <i>Mycobacterium tuberculosis</i> ParB                                                                                                  | This study                                          |
|                | TLE3000+pUT18C::1xFLAG- <i>Streptomyces coelicolor</i> ParB                                                                                                     | This study                                          |
|                | TLE3000+pUT18C::1xFLAG- <i>Porphyromonas gingivalis</i> ParB                                                                                                    | This study                                          |
|                |                                                                                                                                                                 |                                                     |
|                | TLE3001 + pB1H2-w2:: <i>zif268</i> + pU3H3:: <i>zif268</i> binding site                                                                                         | This study                                          |
|                | TLE3001 + pB1H2-w2:: <i>zif268</i> + pU3H3::19bp-NBS                                                                                                            | This study                                          |
|                | TLE3001 + pB1H2-w2:: <i>Caulobacter</i> ParB (R104A + Q173K179K184R201) + pU3H3::7bp-NBS                                                                        | This study                                          |
|                | TLE3001 + pB1H2-w2:: <i>Caulobacter</i> ParB (R104A + Q173K179K184R201) + pU3H3::14bp-NBS                                                                       | This study                                          |
|                | TLE3001 + pB1H2-w2:: <i>Caulobacter</i> ParB (R104A + Q173K179K184R201) + pU3H3::19bp-NBS                                                                       | This study                                          |
|                | TLE3001 + pB1H2-w2:: <i>Caulobacter</i> ParB (R104A + Q173K179K184R201) + pU3H3::24bp-NBS                                                                       | This study                                          |
|                | TLE3001 + pB1H2-w5:: <i>Caulobacter</i> ParB (R104A +                                                                                                           | This study                                          |

|  |                                                                                                                                                                |            |
|--|----------------------------------------------------------------------------------------------------------------------------------------------------------------|------------|
|  | Q173K179K184R201) + pU3H3::19bp-NBS                                                                                                                            |            |
|  | TLE3001 + pB1H2-w5L:: <i>Caulobacter</i> ParB (R104A + Q173K179K184R201) + pU3H3::19bp-NBS                                                                     | This study |
|  | TLE3001 + pB1H2-w2:: <i>zif268</i> + pU3H3::19bp- <i>parS</i>                                                                                                  | This study |
|  | TLE3001 + pB1H2-w2:: <i>Caulobacter</i> ParB (R104A + Q173K179K184R201) + pU3H3::19bp- <i>parS</i>                                                             | This study |
|  | TLE3001 + pB1H2-w2:: <i>Caulobacter</i> ParB (R104A + R173A179T184G201) + pU3H3::19bp- <i>parS</i>                                                             | This study |
|  | BL21 Rosetta pRARE + various pET21b-based protein overexpression vectors (see the plasmid list for the complete collection of protein overexpression plasmids) | This study |

**TABLE S2. PLASMIDS. Related to STAR Methods.**

| Plasmids                        | Description                                                                                                                                                                    | Source                                            |
|---------------------------------|--------------------------------------------------------------------------------------------------------------------------------------------------------------------------------|---------------------------------------------------|
| pENTR::D-TOPO                   | ENTRY vector for Gateway cloning, kanamycin <sup>R</sup>                                                                                                                       | Invitrogen                                        |
|                                 | pENTR:: <i>Bacillus subtilis</i> Noc                                                                                                                                           | This study                                        |
|                                 | pENTR:: <i>Clostridium difficile</i> Noc                                                                                                                                       | This study                                        |
|                                 | pENTR:: <i>Lactobacillus aviarius</i> Noc                                                                                                                                      | This study                                        |
|                                 | pENTR:: <i>Staphylococcus aureus</i> Noc                                                                                                                                       | This study                                        |
|                                 | pENTR:: <i>Bacillus subtilis</i> ParB                                                                                                                                          | This study                                        |
|                                 | pENTR:: <i>Clostridium difficile</i> ParB                                                                                                                                      | This study                                        |
|                                 | pENTR:: <i>Lactobacillus aviarius</i> ParB                                                                                                                                     | This study                                        |
|                                 | pENTR:: <i>Staphylococcus aureus</i> ParB                                                                                                                                      | This study                                        |
|                                 | pENTR:: <i>Caulobacter crescentus</i> ParB                                                                                                                                     | This study                                        |
|                                 | pENTR:: <i>Agrobacterium tumefaciens</i> ParB                                                                                                                                  | This study                                        |
|                                 | pENTR:: <i>Sinorhizobium meliloti</i> ParB                                                                                                                                     | This study                                        |
|                                 | pENTR:: <i>Lawsonia intracellularis</i> ParB                                                                                                                                   | This study                                        |
|                                 | pENTR:: <i>Desulfovibrio vulgaris</i> ParB                                                                                                                                     | This study                                        |
|                                 | pENTR:: <i>Dechloromonas aromatica</i> ParB                                                                                                                                    | This study                                        |
|                                 | pENTR:: <i>Pseudomonas aeruginosa</i> ParB                                                                                                                                     | This study                                        |
|                                 | pENTR:: <i>Xanthomonas campestris</i> ParB                                                                                                                                     | This study                                        |
|                                 | pENTR:: <i>Thermus thermophilus</i> ParB                                                                                                                                       | This study                                        |
|                                 | pENTR:: <i>Bifidobacterium longum</i> ParB                                                                                                                                     | This study                                        |
|                                 | pENTR:: <i>Mycobacterium tuberculosis</i> ParB                                                                                                                                 | This study                                        |
|                                 | pENTR:: <i>Streptomyces coelicolor</i> ParB                                                                                                                                    | This study                                        |
|                                 | pENTR:: <i>Porphyromonas gingivalis</i> ParB                                                                                                                                   | This study                                        |
| pML477                          | Gateway-cloning destination vector for fusion of protein interest to an N-terminally FLAG tag, xylose-inducible promoter, high-copy number plasmid, spectinomycin <sup>R</sup> | Gift from Michael Laub                            |
| pET21b::ParB-(His) <sub>6</sub> | overexpression of ParB-(His) <sub>6</sub> from an IPTG-inducible T7 promoter                                                                                                   | Promega                                           |
|                                 | pET21b:: <i>Caulobacter crescentus</i> -ParB-(His) <sub>6</sub> (WT)                                                                                                           | Gift of Christine Jacob Wagner (Lim et al., 2014) |
|                                 | pET21b:: <i>Caulobacter crescentus</i> -ParB-(His) <sub>6</sub> (DBD)                                                                                                          | This study                                        |
|                                 | pET21b:: <i>Bacillus subtilis</i> -Noc-(His) <sub>6</sub>                                                                                                                      | This study                                        |
|                                 | pET21b:: <i>Bacillus subtilis</i> -Noc-(His) <sub>6</sub> (DBD)                                                                                                                | This study                                        |
|                                 | pET21b::PtoN1-(His) <sub>6</sub> (Q173T179A184G201)                                                                                                                            | This study                                        |
|                                 | pET21b::PtoN2-(His) <sub>6</sub> (R173K179A184G201)                                                                                                                            | This study                                        |
|                                 | pET21b::PtoN3-(His) <sub>6</sub> (R173T179K184G201)                                                                                                                            | This study                                        |
|                                 | pET21b::PtoN4-(His) <sub>6</sub> (R173T179A184R201)                                                                                                                            | This study                                        |
|                                 | pET21b::PtoN5-(His) <sub>6</sub> (Q173K179A184G201)                                                                                                                            | This study                                        |
|                                 | pET21b::PtoN6-(His) <sub>6</sub> (Q173T179K184G201)                                                                                                                            | This study                                        |
|                                 | pET21b::PtoN7-(His) <sub>6</sub> (Q173T179A184R201)                                                                                                                            | This study                                        |
|                                 | pET21b::PtoN8-(His) <sub>6</sub> (R173K179K184G201)                                                                                                                            | This study                                        |
|                                 | pET21b::PtoN9-(His) <sub>6</sub> (R173K179A184R201)                                                                                                                            | This study                                        |
|                                 | pET21b::PtoN10-(His) <sub>6</sub> (R173T179K184R201)                                                                                                                           | This study                                        |

|                     |                                                                                                                               |            |
|---------------------|-------------------------------------------------------------------------------------------------------------------------------|------------|
|                     | pET21b::PtoN11-(His) <sub>6</sub> (Q173K179K184G201)                                                                          | This study |
|                     | pET21b::PtoN12-(His) <sub>6</sub> (Q173K179A184R201)                                                                          | This study |
|                     | pET21b::PtoN13-(His) <sub>6</sub> (Q173T179K184R201)                                                                          | This study |
|                     | pET21b::PtoN14-(His) <sub>6</sub> (R173K179K184R201)                                                                          | This study |
|                     | pET21b::PtoN15-(His) <sub>6</sub> (Q173K179K184R201)                                                                          | This study |
|                     | pET21b:: <i>Caulobacter crescentus</i> -ParB-(His) <sub>6</sub> (Q162A)                                                       | This study |
|                     | pET21b:: <i>Caulobacter crescentus</i> -ParB-(His) <sub>6</sub> (K171A)                                                       | This study |
|                     | pET21b:: <i>Caulobacter crescentus</i> -ParB-(His) <sub>6</sub> (S172A)                                                       | This study |
|                     | pET21b:: <i>Caulobacter crescentus</i> -ParB-(His) <sub>6</sub> (R173A)                                                       | This study |
|                     | pET21b:: <i>Caulobacter crescentus</i> -ParB-(His) <sub>6</sub> (S174A)                                                       | This study |
|                     | pET21b:: <i>Caulobacter crescentus</i> -ParB-(His) <sub>6</sub> (N178A)                                                       | This study |
|                     | pET21b:: <i>Caulobacter crescentus</i> -ParB-(His) <sub>6</sub> (R181A)                                                       | This study |
|                     | pET21b:: <i>Caulobacter crescentus</i> -ParB-(His) <sub>6</sub> (V226A)                                                       | This study |
|                     | pET21b:: <i>Caulobacter crescentus</i> -ParB-(His) <sub>6</sub> (R227A)                                                       | This study |
|                     | pET21b:: <i>Caulobacter crescentus</i> -ParB-(His) <sub>6</sub> (R234A)                                                       | This study |
|                     | pET21b:: <i>Caulobacter crescentus</i> -ParB-(His) <sub>6</sub> (K245A)                                                       | This study |
|                     | pET21b:: <i>Caulobacter crescentus</i> -ParB-(His) <sub>6</sub> (R248A)                                                       | This study |
|                     | pET21b:: <i>Caulobacter crescentus</i> -ParB-(His) <sub>6</sub> (R204A)                                                       | This study |
|                     | pET21b:: <i>Caulobacter crescentus</i> -ParB-(His) <sub>6</sub> (E230A)                                                       | This study |
|                     | pET21b:: <i>Caulobacter crescentus</i> -ParB-(His) <sub>6</sub> (R251A)                                                       | This study |
|                     | pET21b::ParB-(His) <sub>6</sub> chimera 1                                                                                     | This study |
|                     | pET21b::ParB-(His) <sub>6</sub> chimera 4                                                                                     | This study |
|                     | pET21b:: <i>Caulobacter crescentus</i> -ParB-(His) <sub>6</sub> (RRMT)                                                        | This study |
|                     | pET21b:: <i>Caulobacter crescentus</i> -ParB-(His) <sub>6</sub> (RRLT)                                                        | This study |
|                     | pET21b:: <i>Caulobacter crescentus</i> -ParB-(His) <sub>6</sub> (QRMR)                                                        | This study |
|                     | pET21b:: <i>Caulobacter crescentus</i> -ParB-(His) <sub>6</sub> (QSRR)                                                        | This study |
|                     | pET21b:: <i>Caulobacter crescentus</i> -ParB-(His) <sub>6</sub> (QTNR)                                                        | This study |
|                     | pET21b:: <i>Caulobacter crescentus</i> -ParB-(His) <sub>6</sub> (QRYR)                                                        | This study |
|                     | pET21b:: <i>Caulobacter crescentus</i> -ParB-(His) <sub>6</sub> (QRRR)                                                        | This study |
|                     | pET21b:: <i>Caulobacter crescentus</i> -ParB-(His) <sub>6</sub> (QRKR)                                                        | This study |
|                     | pET21b:: <i>Caulobacter crescentus</i> -ParB-(His) <sub>6</sub> (TEPG)                                                        | This study |
| pUT18C::1xFLAG-DEST | Destination vector for Gateway cloning, 1xFLAG tag fused to the N-terminus of protein of interest, carbenicillin <sup>R</sup> | This study |
|                     | pUT18C::1xFLAG- <i>Bacillus subtilis</i> Noc                                                                                  | This study |
|                     | pUT18C::1xFLAG- <i>Clostridium difficile</i> Noc                                                                              | This study |
|                     | pUT18C::1xFLAG- <i>Lactobacillus aviarius</i> Noc                                                                             | This study |
|                     | pUT18C::1xFLAG- <i>Staphylococcus aureus</i> Noc                                                                              | This study |
|                     | pUT18C::1xFLAG- <i>Bacillus subtilis</i> ParB                                                                                 | This study |
|                     | pUT18C::1xFLAG- <i>Clostridium difficile</i> ParB                                                                             | This study |
|                     | pUT18C::1xFLAG- <i>Lactobacillus aviarius</i> ParB                                                                            | This study |
|                     | pUT18C::1xFLAG- <i>Staphylococcus aureus</i> ParB                                                                             | This study |
|                     | pUT18C::1xFLAG- <i>Caulobacter crescentus</i> ParB                                                                            | This study |
|                     | pUT18C::1xFLAG- <i>Agrobacterium tumefaciens</i> ParB                                                                         | This study |
|                     | pUT18C::1xFLAG- <i>Sinorhizobium meliloti</i> ParB                                                                            | This study |
|                     | pUT18C::1xFLAG- <i>Lawsonia intracellularis</i> ParB                                                                          | This study |

|  |                                                                |                                     |
|--|----------------------------------------------------------------|-------------------------------------|
|  | pUT18C::1xFLAG- <i>Desulfovibrio vulgaris</i> ParB             | This study                          |
|  | pUT18C::1xFLAG- <i>Dechloromonas aromatica</i> ParB            | This study                          |
|  | pUT18C::1xFLAG- <i>Pseudomonas aeruginosa</i> ParB             | This study                          |
|  | pUT18C::1xFLAG- <i>Xanthomonas campestris</i> ParB             | This study                          |
|  | pUT18C::1xFLAG- <i>Thermus thermophilus</i> ParB               | This study                          |
|  | pUT18C::1xFLAG- <i>Bifidobacterium longum</i> ParB             | This study                          |
|  | pUT18C::1xFLAG- <i>Mycobacterium tuberculosis</i> ParB         | This study                          |
|  | pUT18C::1xFLAG- <i>Streptomyces coelicolor</i> ParB            | This study                          |
|  | pUT18C::1xFLAG- <i>Porphyromonas gingivalis</i> ParB           | This study                          |
|  | pB1H2-w2::zif268                                               | (Noyes et al., 2008)<br>via Addgene |
|  | pB1H2-w5::zif268                                               | (Noyes et al., 2008)<br>via Addgene |
|  | pB1H2-w5L::zif268                                              | (Noyes et al., 2008)<br>via Addgene |
|  | pU3H3::MCS                                                     | (Noyes et al., 2008)<br>via Addgene |
|  | pU3H3::zif268 binding site                                     | (Noyes et al., 2008)<br>via Addgene |
|  | pB1H2-w2:: <i>Caulobacter</i> ParB (R104A + Q173K179K184R201)  | This study                          |
|  | pB1H2-w5:: <i>Caulobacter</i> ParB (R104A + Q173K179K184R201)  | This study                          |
|  | pB1H2-w5L:: <i>Caulobacter</i> ParB (R104A + Q173K179K184R201) | This study                          |
|  | pB1H2-w2:: <i>Caulobacter</i> ParB (R104A + R173A179T184G201)  | This study                          |
|  | pU3H3::7bp-NBS                                                 | This study                          |
|  | pU3H3::14bp-NBS                                                | This study                          |
|  | pU3H3::19bp-NBS                                                | This study                          |
|  | pU3H3::24bp-NBS                                                | This study                          |
|  | pU3H3::19bp-parS                                               | This study                          |

**TABLE S3. PRIMERS. Related to STAR Methods.**

| <b>Primers</b>           | <b>Sequences</b>                                         |
|--------------------------|----------------------------------------------------------|
|                          | <b>For construction of pUT18C-1xFLAG-DEST</b>            |
| 1934                     | acaatttcacacaggaacagctatggactacaaggacgacgacgacaagggctcg  |
| 1935                     | acttagttatatcgatgcatcgaaccactttgtacaagaaagctgaacgagaaaac |
| 1936                     | agctgttcctgtgtgaaattgtatccgctcacaattc                    |
| 1937                     | tcgatgcatcgatataactaagtaatatggtgcac                      |
|                          | <b>For ChIP-qPCR</b>                                     |
| ybbD_parSF2              | GTAAGATACCAGGGCAAGG                                      |
| ybbD_parSR2              | TTACTCTGCACAAGCATCA                                      |
| ygcE_NBSF2               | CGCTACGACGCGATGAATAA                                     |
| ygcE_NBSR2               | CTCTGGATCGAATCCACATTCC                                   |
| ompG_F1                  | GCGGAGCCTTCAGTCTATTT                                     |
| ompG_R1                  | CAAACCACGTTCCACGTTTAC                                    |
|                          | <b>For bio-layer interferometry assays</b>               |
| NBS_FOR                  | [Biotin]GGGAtaTTTCCCGGGAAAta                             |
| NBS_REV                  | taTTTCCCGGGAAAtaTCCC                                     |
| parS_FOR                 | [Biotin]GGGAtgTTTCACGTGAAAcA                             |
| parS_REV                 | tgTTTCACGTGAAAcATCCC                                     |
| site1_FOR                | [Biotin]GGGAtgTTTCTCGAGAAAcA                             |
| site1_REV                | tgTTTCTCGAGAAAcATCCC                                     |
| site10_FOR               | [Biotin]GGGAttTTTCgCGcGAAAaa                             |
| site10_REV               | ttTTTCgCGcGAAAaaTCCC                                     |
| site11_FOR               | [Biotin]GGGAttTTTCcCGgGAAAaa                             |
| site11_REV               | ttTTTCcCGgGAAAaaTCCC                                     |
| site12_FOR               | [Biotin]GGGAtaTTTCACGTGAAAta                             |
| site12_REV               | taTTTCACGTGAAAtaTCCC                                     |
| site13_FOR               | [Biotin]GGGAtaTTTCtCGaGAAAta                             |
| site13_REV               | taTTTCtCGaGAAAtaTCCC                                     |
| site14_FOR               | [Biotin]GGGAtaTTTCgCGcGAAAta                             |
| site14_REV               | taTTTCgCGcGAAAtaTCCC                                     |
| site2_FOR                | [Biotin]GGGAtgTTTCGCGCGAAAcA                             |
| site2_REV                | tgTTTCGCGCGAAAcATCCC                                     |
| site3_FOR                | [Biotin]GGGAtgTTTCCCGGGAAAcA                             |
| site3_REV                | tgTTTCCCGGGAAAcATCCC                                     |
| site4_FOR                | [Biotin]GGGAtcTTTCACGTGAAAgA                             |
| site4_REV                | tcTTTCACGTGAAAgATCCC                                     |
| site5_FOR                | [Biotin]GGGAtcTTTCtCGaGAAAgA                             |
| site5_REV                | tcTTTCtCGaGAAAgATCCC                                     |
| site6_FOR                | [Biotin]GGGAtcTTTCgCGcGAAAgA                             |
| site6_REV                | tcTTTCgCGcGAAAgATCCC                                     |
| site7_FOR                | [Biotin]GGGAtcTTTCcCGgGAAAgA                             |
| site7_REV                | tcTTTCcCGgGAAAgATCCC                                     |
| site8_FOR                | [Biotin]GGGAttTTTCACGTGAAAaa                             |
| site8_REV                | ttTTTCACGTGAAAaaTCCC                                     |
| site9_FOR                | [Biotin]GGGAttTTTCtCGaGAAAaa                             |
| site9_REV                | ttTTTCtCGaGAAAaaTCCC                                     |
|                          | <b>For the construction of pU3H3-NBS and pU3H3-parS</b>  |
| NBS_anneal_7bp_sparcer_F | Ccgggtatttcccgggaaataggg                                 |

|                           |                                                                                                |
|---------------------------|------------------------------------------------------------------------------------------------|
| NBS_anneal_7bp_spacer_R   | aattccctattcccgggaaatac                                                                        |
| NBS_anneal_14bp_spacer_F  | ccgggtattcccgggaaataggcgcgccg                                                                  |
| NBS_anneal_14bp_spacer_R  | aattcggcgcgccattcccgggaaatac                                                                   |
| NBS_anneal_19bp_spacer_F  | ccgggtattcccgggaaataggttcgcgcgccg                                                              |
| NBS_anneal_19bp_spacer_R  | Aattcggcgcgcgaaacctattcccgggaaatac                                                             |
| NBS_anneal_24bp_spacer_F  | ccgggtattcccgggaaataggttctggcgcgccg                                                            |
| NBS_anneal_24bp_spacer_R  | aattcggcgcgcgccaagaa<br>acctattcccgggaaatac                                                    |
| parS_anneal_19bp_spacer_F | ccgggtgtttcacgtgaaacaggttcgcgcgccg                                                             |
| parS_anneal_19bp_spacer_R | ttaagccgcgcgctttggacaaagtgcactttgtg                                                            |
|                           | <b>For the construction of AB1157 ybbD::parS ygcE::NBS strain</b>                              |
| 1940                      | aaatattggagctggattgcctgatgctgtgcagagtaatgtccacgtggaacaattccggggatccgtgacctg                    |
| 1941                      | ttgacgacttcgatatgggatagactcttaattcaagcaatgtaggctggagctgctcg                                    |
| 3139                      | ggggaatgtggattcgatccagagctggtcgaatgcgtaataattcccgggaaataattccggggatccgtcgacctg                 |
| 3140                      | tatgttcaggccgggcagttcccgccggccttctcactgtaggctggagctgcttcaag                                    |
|                           | <b>For generation of Illumina libraries for deep mutational scanning experiments</b>           |
| 4nns_offset_0_F           | ACACTCTTTCCCTACACGACGCTCTTCCGATCTgctcaaactattggcaagag                                          |
| 4nns_offset_1_F           | ACACTCTTTCCCTACACGACGCTCTTCCGATCTtgcctcaaactattggcaagag                                        |
| 4nns_offset_2_F           | ACACTCTTTCCCTACACGACGCTCTTCCGATCTttgctcaaactattggcaagag                                        |
| 4nns_offset_3_F           | ACACTCTTTCCCTACACGACGCTCTTCCGATCTattgctcaaactattggcaagag                                       |
| 4nns_offset_4_F           | ACACTCTTTCCCTACACGACGCTCTTCCGATCTcattgctcaaactattggcaagag                                      |
| 4nns_R                    | GTGACTGGAGTTCAGACGTGTGCTCTTCCGATCTTTTTGCTAACGCTACGGGATC                                        |
| NEBNext universal primer  | AAT GAT ACG GCG ACC ACC GAG ATC TAC ACT CTT TCC CTA CAC GAC GCT CTT CCG ATC-s-T                |
| NEBNext Index primer      | CAAGCAGAAGACGGCATAACGAGATNNNNNNGTGACTGGAGTTCAGACGTGTGCTCTTCCGATC-s-T                           |
|                           | <b>For generation of the deep mutational scanning library</b>                                  |
| For_B_NNS_HTH             | GAGGTACAGTCCTATCTTGTGAGTGGAGAGCTGACAGCGNNSCATGC<br>GCGTGCGATTGCCGCTGC                          |
| Rev_B_NNS_HTH             | GTCCGGCAAS <u>NNAAGAAGACGCAT</u> <u>SNNATTCGCTACGTGAGAS</u> <u>NNACT</u><br>CTTGCCAATAGTTTGAGC |
|                           | <b>For the amplification of the pENTR backbone</b>                                             |
| pENTR_gibson_backbone_R   | ggtgaagggggcgccgaggcctgc                                                                       |
| pENTR_gibson_backbone_F   | aaggggtggcgccgaccagcttcttg                                                                     |

Nucleotides in red font are spacer bases used to increase the diversity of the Illumina library. Underlined nucleotides are either Illumina library barcodes or NNS bases.



**TABLE S4. X-RAY DATA COLLECTION AND PROCESSING STATISTICS. Related to Figures 2 and 4.**

| <b>Structure</b>                                                   | <b>ParB (DBD)-<i>parS</i> complex</b>          | <b>Noc (DBD)-<i>NBS</i> complex</b>            |
|--------------------------------------------------------------------|------------------------------------------------|------------------------------------------------|
| Data collection                                                    |                                                |                                                |
| Diamond Light Source beamline                                      | I04                                            | I03                                            |
| Wavelength (Å)                                                     | 0.980                                          | 0.976                                          |
| Detector                                                           | Pilatus 6M-F                                   | Eiger2 XE 16M                                  |
| Resolution range (Å)                                               | 40.12 – 2.40 (2.49 – 2.40)                     | 72.30 – 2.23 (2.66 – 2.23) <sup>a</sup>        |
| Space Group                                                        | C2                                             | C2                                             |
| Cell parameters (Å/°)                                              | $a = 122.1, b = 40.7, c = 94.0, \beta = 121.4$ | $a = 134.1, b = 60.6, c = 81.1, \beta = 116.9$ |
| Total no. of measured intensities                                  | 105021 (10942)                                 | 142152 (6183)                                  |
| Unique reflections                                                 | 16317 (1662)                                   | 10830 (542)                                    |
| Multiplicity                                                       | 6.4 (6.6)                                      | 13.1 (11.4)                                    |
| Mean $\langle I/\sigma(I) \rangle$                                 | 7.0 (2.0)                                      | 9.3 (1.5)                                      |
| Completeness (spherical; %)                                        | 99.7 (99.2)                                    | 38.1 (4.7)                                     |
| Completeness (ellipsoidal; %)                                      | -                                              | 88.4 (57.2)                                    |
| $R_{\text{merge}}^b$                                               | 0.137 (0.801)                                  | 0.108 (0.851)                                  |
| $R_{\text{meas}}^c$                                                | 0.150 (0.869)                                  | 0.112 (0.891)                                  |
| $CC_{1/2}^d$                                                       | 0.992 (0.850)                                  | 1.000 (0.847)                                  |
| Wilson $B$ value (Å <sup>2</sup> )                                 | 42.1                                           | 115.7                                          |
| Refinement                                                         |                                                |                                                |
| Resolution range (Å)                                               | 40.12 – 2.40                                   | 72.30 – 2.23                                   |
| Reflections: working/free <sup>e</sup>                             | 15480/826                                      | 10231/599                                      |
| $R_{\text{work}}^f$                                                | 0.216                                          | 0.231                                          |
| $R_{\text{free}}^f$                                                | 0.232                                          | 0.279                                          |
| Ramachandran plot:<br>favoured/allowed/disallowed <sup>g</sup> (%) | 96.5/3.5/0.0                                   | 95.4/4.6/0.0                                   |
| R.m.s. bond distance deviation (Å)                                 | 0.003                                          | 0.002                                          |
| R.m.s. bond angle deviation (°)                                    | 1.08                                           | 1.03                                           |

|                                                                        |             |               |
|------------------------------------------------------------------------|-------------|---------------|
| No. of protein residues per chain                                      | 121/140     | 105/116       |
| No. of DNA bases per chain                                             | 20/20       | 22/22         |
| No. of water/glycerol molecules                                        | 82/2        | 0/0           |
| Mean <i>B</i> factors: protein/DNA/<br>water/overall (Å <sup>2</sup> ) | 51/46/38/49 | 155/148/0/154 |
| <b>PDB accession code</b>                                              | <b>6S6H</b> | <b>6Y93</b>   |

Values in parentheses are for the outer resolution shell.

<sup>a</sup> After correction by STARANISO to remove poorly measured reflections affected by anisotropy, the ellipsoidal resolutions were:

2.23 Å in direction  $0.854 a^* + 0.017 b^* - 0.519 c^*$

3.83 Å in direction  $0.302 a^* + 0.784 b^* + 0.543 c^*$

4.02 Å in direction  $0.130 a^* + 0.911 b^* + 0.391 c^*$

<sup>b</sup>  $R_{\text{merge}} = \frac{\sum_{hkl} \sum_i |I_i(hkl) - \langle I(hkl) \rangle|}{\sum_{hkl} \sum_i I_i(hkl)}$ .

<sup>c</sup>  $R_{\text{meas}} = \frac{\sum_{hkl} [N(N-1)]^{1/2} \times \sum_i |I_i(hkl) - \langle I(hkl) \rangle|}{\sum_{hkl} \sum_i I_i(hkl)}$ , where  $I_i(hkl)$  is the  $i$ th observation of reflection  $hkl$ ,  $\langle I(hkl) \rangle$  is the weighted average intensity for all observations  $i$  of reflection  $hkl$  and  $N$  is the number of observations of reflection  $hkl$ .

<sup>d</sup>  $CC_{1/2}$  is the correlation coefficient between symmetry equivalent intensities from random halves of the dataset.

<sup>e</sup> The dataset was split into "working" and "free" sets consisting of 95 and 5% of the data respectively. The free set was not used for refinement.

<sup>f</sup> The R-factors  $R_{\text{work}}$  and  $R_{\text{free}}$  are calculated as follows:  $R = \frac{\sum (|F_{\text{obs}} - F_{\text{calc}}|)}{\sum |F_{\text{obs}}|}$ , where  $F_{\text{obs}}$  and  $F_{\text{calc}}$  are the observed and calculated structure factor amplitudes, respectively.

<sup>g</sup> As calculated using MolProbity (Chen et al., 2010).

**TABLE S5. DEEP MUTATIONAL SCAN AND ChIP-Seq. Related to STAR Methods.**

| <b>Deep mutational scanning libraries</b>                                                                                    | <b>GEO</b>             |
|------------------------------------------------------------------------------------------------------------------------------|------------------------|
| Pre-selection library, replicate 1                                                                                           | This study (GSE129285) |
| Pre-selection library, replicate 2                                                                                           | This study (GSE129285) |
| Pre-selection library, replicate 3                                                                                           | This study (GSE129285) |
| Post-selection library, selection for <i>parS</i> -binding capability, replicate 1                                           | This study (GSE129285) |
| Post-selection library, selection for <i>parS</i> -binding capability, replicate 2                                           | This study (GSE129285) |
| Post-selection library, selection for <i>parS</i> -binding capability, replicate 3                                           | This study (GSE129285) |
| Post-selection library, selection for <i>NBS</i> -binding capability, replicate 1                                            | This study (GSE129285) |
| Post-selection library, selection for <i>NBS</i> -binding capability, replicate 2                                            | This study (GSE129285) |
| Post-selection library, selection for <i>NBS</i> -binding capability, replicate 3                                            | This study (GSE129285) |
| <b>ChIP-seq datasets</b>                                                                                                     |                        |
| TLE3000+pUT18C::1xFLAG-Bacillus subtilis Noc, fixation with 1% formaldehyde, α-FLAG antibody (Sigma), ChIP fraction          | This study (GSE129285) |
| TLE3000+pUT18C::1xFLAG-Clostridium difficile Noc, fixation with 1% formaldehyde, α-FLAG antibody (Sigma), ChIP fraction      | This study (GSE129285) |
| TLE3000+pUT18C::1xFLAG-Lactobacillus aviarius Noc, fixation with 1% formaldehyde, α-FLAG antibody (Sigma), ChIP fraction     | This study (GSE129285) |
| TLE3000+pUT18C::1xFLAG-Staphylococcus aureus Noc, fixation with 1% formaldehyde, α-FLAG antibody (Sigma), ChIP fraction      | This study (GSE129285) |
| TLE3000+pUT18C::1xFLAG-Bacillus subtilis ParB, fixation with 1% formaldehyde, α-FLAG antibody (Sigma), ChIP fraction         | This study (GSE129285) |
| TLE3000+pUT18C::1xFLAG-Clostridium difficile ParB, fixation with 1% formaldehyde, α-FLAG antibody (Sigma), ChIP fraction     | This study (GSE129285) |
| TLE3000+pUT18C::1xFLAG-Lactobacillus aviarius ParB, fixation with 1% formaldehyde, α-FLAG antibody (Sigma), ChIP fraction    | This study (GSE129285) |
| TLE3000+pUT18C::1xFLAG-Staphylococcus aureus ParB, fixation with 1% formaldehyde, α-FLAG antibody (Sigma), ChIP fraction     | This study (GSE129285) |
| TLE3000+pUT18C::1xFLAG-Caulobacter crescentus ParB, fixation with 1% formaldehyde, α-FLAG antibody (Sigma), ChIP fraction    | This study (GSE129285) |
| TLE3000+pUT18C::1xFLAG-Agrobacterium tumefaciens ParB, fixation with 1% formaldehyde, α-FLAG antibody (Sigma), ChIP fraction | This study (GSE129285) |
| TLE3000+pUT18C::1xFLAG-Sinorhizobium meliloti ParB, fixation with 1% formaldehyde, α-FLAG antibody (Sigma), ChIP fraction    | This study (GSE129285) |
| TLE3000+pUT18C::1xFLAG-Lawsonia intracellularis ParB, fixation with 1% formaldehyde, α-FLAG antibody (Sigma), ChIP fraction  | This study (GSE129285) |
| TLE3000+pUT18C::1xFLAG-Desulfovibrio vulgaris ParB, fixation with 1% formaldehyde, α-FLAG antibody (Sigma), ChIP fraction    | This study (GSE129285) |
| TLE3000+pUT18C::1xFLAG-Dechloromonas aromatica ParB, fixation with 1% formaldehyde, α-FLAG antibody (Sigma), ChIP fraction   | This study (GSE129285) |
| TLE3000+pUT18C::1xFLAG-Pseudomonas aeruginosa ParB, fixation with 1% formaldehyde, α-FLAG antibody (Sigma), ChIP fraction    | This study (GSE129285) |
| TLE3000+pUT18C::1xFLAG-Xanthomonas campestris ParB, fixation with 1% formaldehyde, α-FLAG antibody (Sigma), ChIP fraction    | This study (GSE129285) |
| TLE3000+pUT18C::1xFLAG-Thermus thermophilus ParB, fixation with 1% formaldehyde, α-FLAG antibody (Sigma), ChIP fraction      | This study (GSE129285) |
| TLE3000+pUT18C::1xFLAG-Bifidobacterium longum ParB, fixation with 1% formaldehyde, α-FLAG antibody (Sigma), ChIP fraction    | This study (GSE129285) |

|                                                                                                                               |                        |
|-------------------------------------------------------------------------------------------------------------------------------|------------------------|
| TLE3000+pUT18C::1xFLAG-Mycobacterium tuberculosis ParB, fixation with 1% formaldehyde, α-FLAG antibody (Sigma), CHIP fraction | This study (GSE129285) |
| TLE3000+pUT18C::1xFLAG-Streptomyces coelicolor ParB, fixation with 1% formaldehyde, α-FLAG antibody (Sigma), CHIP fraction    | This study (GSE129285) |
| TLE3000+pUT18C::1xFLAG-Porphyromonas gingivalis ParB, fixation with 1% formaldehyde, α-FLAG antibody (Sigma), CHIP fraction   | This study (GSE129285) |
